# Supplementary material for: Strategies for large-scale analysis of non-histone protein methylation by LC-MS/MS
Source: Royal Society of Chemistry journal article supplement (doi:10.1039/c7an00954b), 2017-01-01
Supplement: c7an00954b1.pdf [file c7an00954b1.pdf]

## 1 **Captions for Figures and Tables**

2 **Figure 1.** Different forms of methylation. A) N-methylation (red), O-  
3 methylation (blue) and S-methylation (green) could occur on eight amino  
4 acid residues. B) The 6 methylation forms occurred on Lys and Arg  
5 residues.

6 **Figure 2.** Challenges for the analysis of methylproteome. A), The structure  
7 alteration caused by methylation is much less significant when compared  
8 with other modification forms like phosphorylation, acetylation and  
9 glycosylation. B), Methylation introduces mass shifts identical to those of  
10 some amino acid substitutions which makes the confident identification  
11 difficult.

12 **Figure 3.** Strategy for the enrichment of methylpeptides using  
13 conventional SCX or High-pH SCX. SCX separation conducted under  
14 high-pH condition can alleviate the interference of histidine containing  
15 peptides.

16 **Figure 4.** Different strategies of metabolic labeling for improving the  
17 confidence in methylation identification. A), hM-SILAC. B), iMethyl-  
18 SILAC. C), MILS.

19

20 **Table 1** Recent studies on large-scale analysis of methylproteome (>500  
21 identified sites)

22 **Table 2** The common characteristic ions and neutral losses for methylated

23 peptides

24

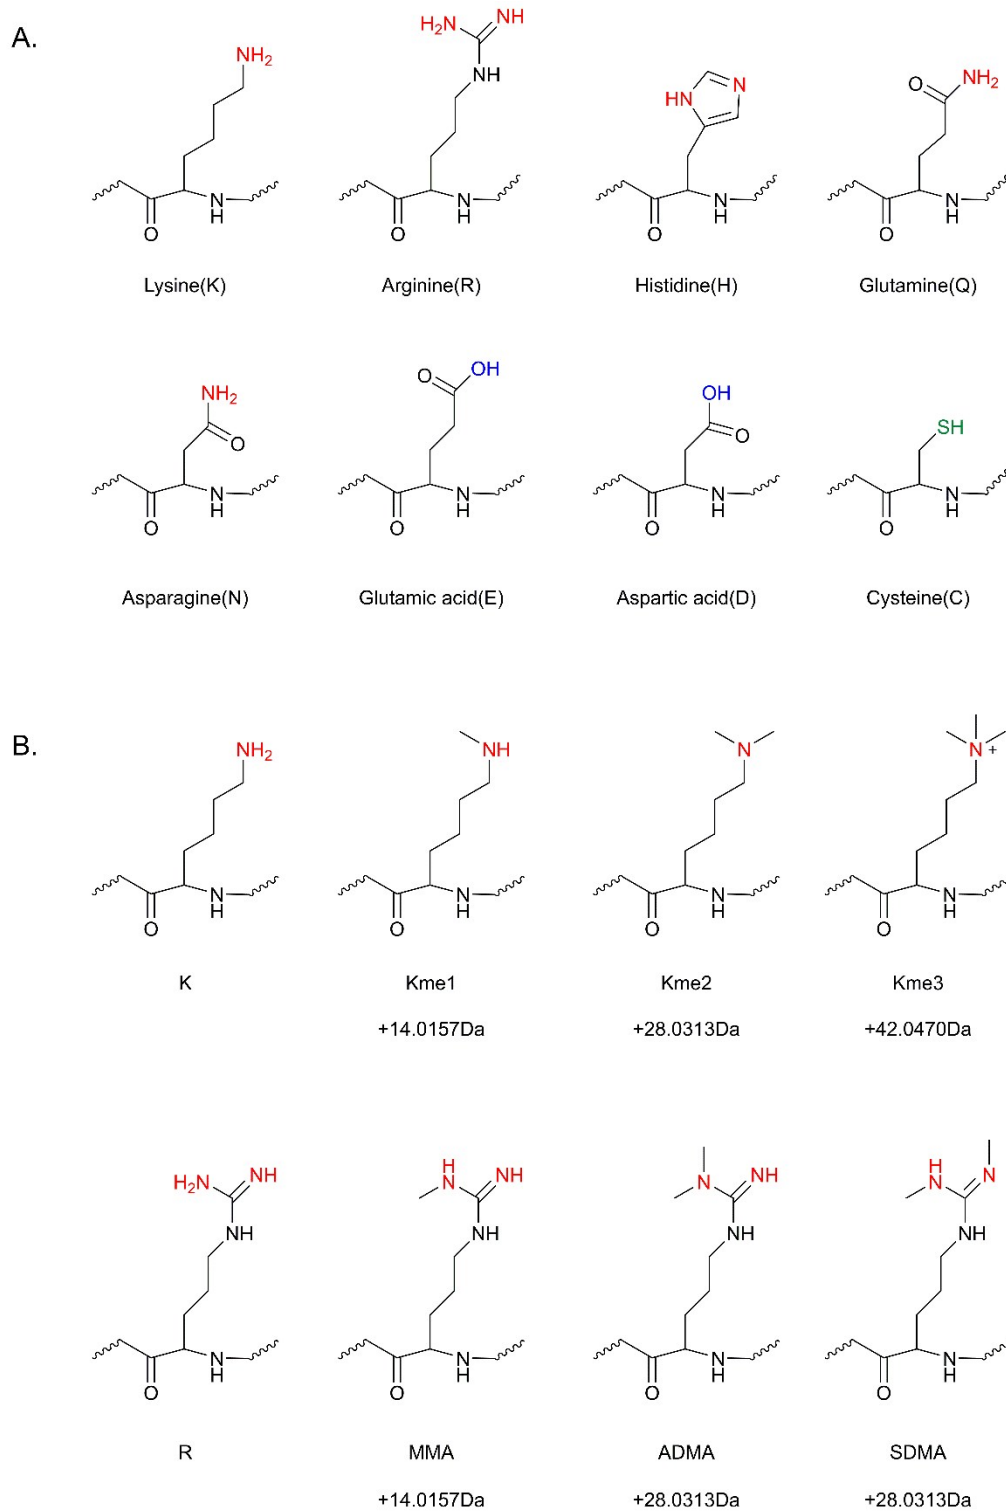

27 **Figure 1.** Different forms of methylation. A) N-methylation (red), O-methylation  
 28 (blue) and S-methylation (green) could occur on eight amino acid residues. B) The 6  
 29 methylation forms occurred on Lys and Arg residues.

A.

| Modification    | Structure | Enrichment methods                   |
|-----------------|-----------|--------------------------------------|
| Methylation     |           | Lacking efficient enrichment methods |
| Phosphorylation |           | IMAC                                 |
| Acetylation     |           | Immunoaffinity chromatography        |
| Glycosylation   |           | HILIC                                |

30

B.

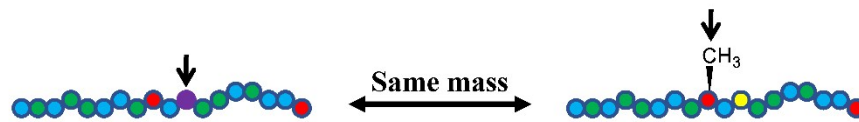

| Description                    | Monoisotopic mass | Composition |
|--------------------------------|-------------------|-------------|
| Mono-Methylation               | 14.0157           | H(2) C(1)   |
| Asp, Glu mass differential     | 14.0157           | H(2) C(1)   |
| Gly, Ala mass differential     | 14.0157           | H(2) C(1)   |
| Ser, Thr mass differential     | 14.0157           | H(2) C(1)   |
| Val, Leu/Ile mass differential | 14.0157           | H(2) C(1)   |
| Asn, Gln mass differential     | 14.0157           | H(2) C(1)   |
| Di-Methylation                 | 28.0313           | H(4) C(2)   |
| Ala, Val mass differential     | 28.0313           | H(4) C(2)   |
| Cys, Met mass differential     | 28.0313           | H(4) C(2)   |
| Tri-Methylation                | 42.0470           | H(6) C(3)   |
| Gly, Val mass differential     | 42.0470           | H(6) C(3)   |
| Ala, Leu/Ile mass differential | 42.0470           | H(6) C(3)   |

31

32

● K/R      ● → ● Amino acids with mass differential identical to methyl group(s)

33

34 **Figure 2.** Challenges for the analysis of methylproteome. A), The structure alteration  
 35 caused by methylation is much less significant when compared with other modification  
 36 forms like phosphorylation, acetylation and glycosylation. B), Methylation introduces

37 mass shifts identical to the mass differentials between many different amino acids  
38 which makes the confident identification difficult.

39

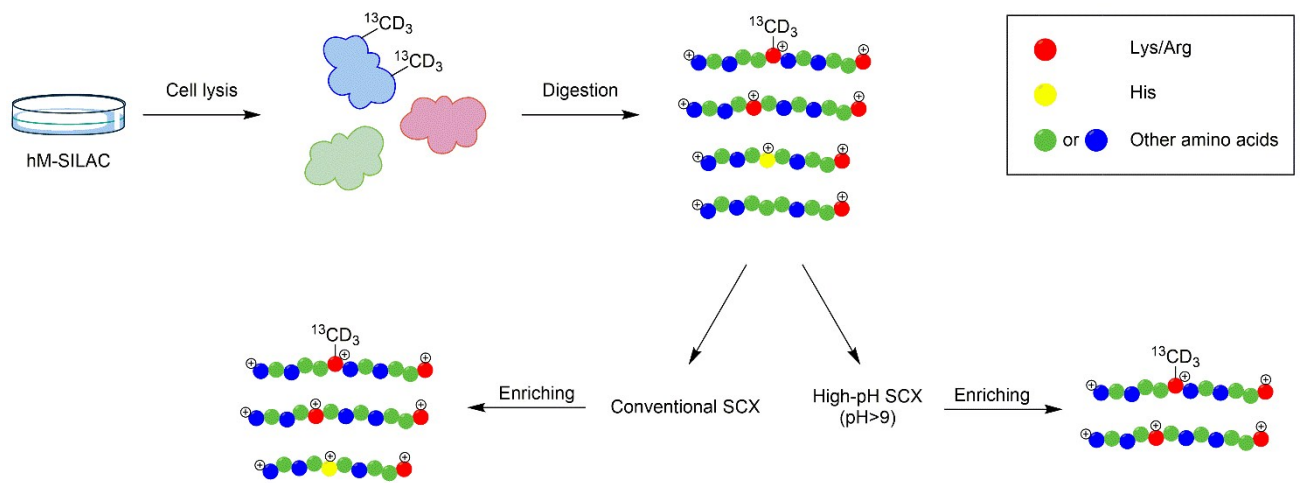

40

41 **Figure 3.** Strategies for the enrichment of methylpeptides using conventional SCX and

42 High-pH SCX. SCX separation conducted under high-pH condition can alleviate the

43 interference of histidine containing peptides.

44

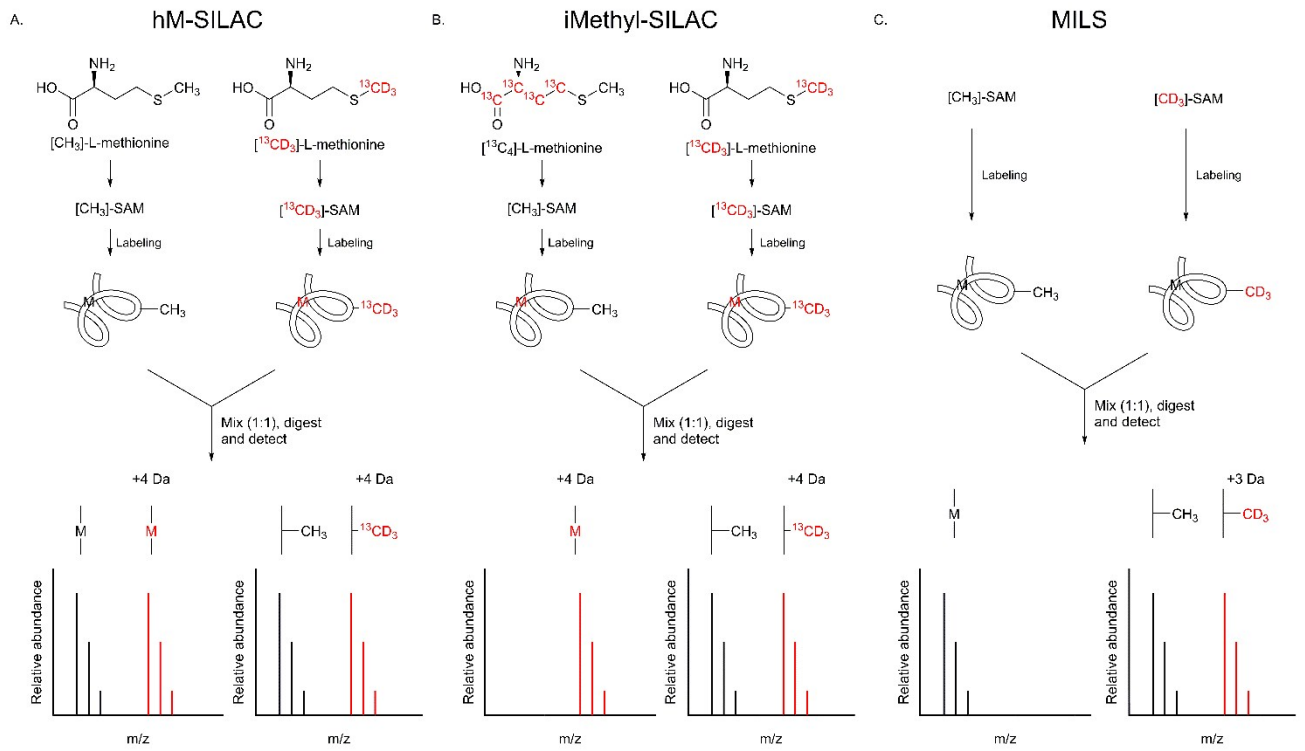

49 **Table 1** Recent studies on large-scale analysis of methylproteome (>500 identified  
50 sites)

| Organism                | Enrichment method                                                    | Confidence control                                                                             | Methylation sites                                     | Ref.(year)  |
|-------------------------|----------------------------------------------------------------------|------------------------------------------------------------------------------------------------|-------------------------------------------------------|-------------|
| HeLa cells              | Immunoaffinity purification at the peptide level coupled with SCX    | Global target-decoy FDR estimates                                                              | 323 Kme1<br>127 Kme2<br>102 Kme3                      | (44) (2013) |
| <i>T. brucei</i>        | SCX fractionation                                                    | Global target-decoy FDR estimates                                                              | 649 MMA<br>683 DMA                                    | (57) (2013) |
| HCT116 cells            | Immunoaffinity purification at the peptide level                     | Global target-decoy FDR estimates                                                              | 1473 MMA<br>497 DMA<br>132 Kme1<br>35 Kme2<br>31 Kme3 | (37) (2014) |
| HEK 293T                | Immunoaffinity purification at the peptide level coupled with SCX    | Separate target-decoy FDR estimates                                                            | 1027 MMA                                              | (38) (2014) |
| T cells                 | Immunoaffinity purification                                          | iMethyl-SILAC                                                                                  | 2400 MMA<br>465 DMA                                   | (22) (2015) |
| HEK293                  | High-pH reversed-phase fractionation and Immunoaffinity purification | Global target-decoy FDR estimates<br>(Separate target-decoy FDR estimates may be used as well) | 8030 MMA                                              | (29) (2016) |
| HeLa cells              | SCX prefractionation with immunoaffinity purification                | Separate target-decoy FDR estimates                                                            | 1246 Kme1<br>59 Kme2<br>53 Kme3                       | (45) (2016) |
| ESCC cell line KYSE-150 | SCX prefractionation with immunoaffinity purification                | Separate target-decoy FDR estimates                                                            | 1032 Kme1                                             | (46) (2016) |
| HEK293                  | online SCX-RP-MS                                                     | Separate target-decoy FDR                                                                      | 77 MMA<br>163 DMA                                     | (55) (2016) |



|             |                      |           |          |             |
|-------------|----------------------|-----------|----------|-------------|
|             |                      | estimates | 305 Kme1 |             |
|             |                      |           | 28 Kme2  |             |
|             |                      |           | 66 Kme3  |             |
|             |                      |           | 218 MMA  |             |
|             |                      |           | 587 DMA  |             |
| HepG2 cells | SCX based enrichment | hM-SILAC  | 35 Kme1  | (56) (2016) |
|             |                      |           | 19 Kme2  |             |
|             |                      |           | 28 Kme3  |             |

52 **Table 2** The common characteristic ions and neutral losses for methylated peptides

| Types of fragments | Name of ion or neutral loss | mass (Da) | Methylation type | ref. (year)                |
|--------------------|-----------------------------|-----------|------------------|----------------------------|
| characteristic ion | Dimethylammonium            | 46.0657   | aDMA             | (78) (2003)                |
| characteristic ion | Dimethylcarbodiimidium      | 71.0609   | sDMA or aDMA     | (78) (2003)                |
| characteristic ion | Monomethylguanidinium       | 74.0718   | MMA              | (82) (2004)                |
| characteristic ion | Immonium ion                | 98.0970   | Kme1 or Kme2     | (80) (2004)<br>(81) (2008) |
| characteristic ion | Immonium ion                | 112.1126  | Kme2             | (80) (2004)                |
| neutral loss       | Monomethylamine             | 31.0422   | MMA or sDMA      | (79) (2004)<br>(30) (2004) |
| neutral loss       | Dimethylamine               | 45.0578   | aDMA             | (78) (2003)                |
| neutral loss       | Trimethylamine              | 59.0735   | Kme3             | (80) (2004)                |
| neutral loss       | Dimethylcarbodiimide        | 70.0531   | sDMA             | (78) (2003)                |
| neutral loss       | Monomethylguanidine         | 73.0640   | MMA              | (30) (2004)                |

53

54
